# Supplementary material
Source: PubMed Central journal article supplement (PMC3466594)
Supplement: NIHMS396739-supplement-2_si_002.pdf [file NIHMS396739-supplement-2_si_002.pdf]

# Organometallic Palladium Complexes with a Water-Soluble Iminophosphorane Ligand as Potential Anticancer Agents

*Monica Carreira,<sup>a</sup> Rubén Calvo-Sanjuán,<sup>b</sup> Mercedes Sanaú,<sup>c</sup> Isabel Marzo,<sup>b</sup> and María*

*Contel\*<sup>a</sup>*

**Supporting Information**

1.  $^1\text{H}$  and  $^{13}\text{C}\{^1\text{H}\}$  NMR spectra for compounds 2 and 3.

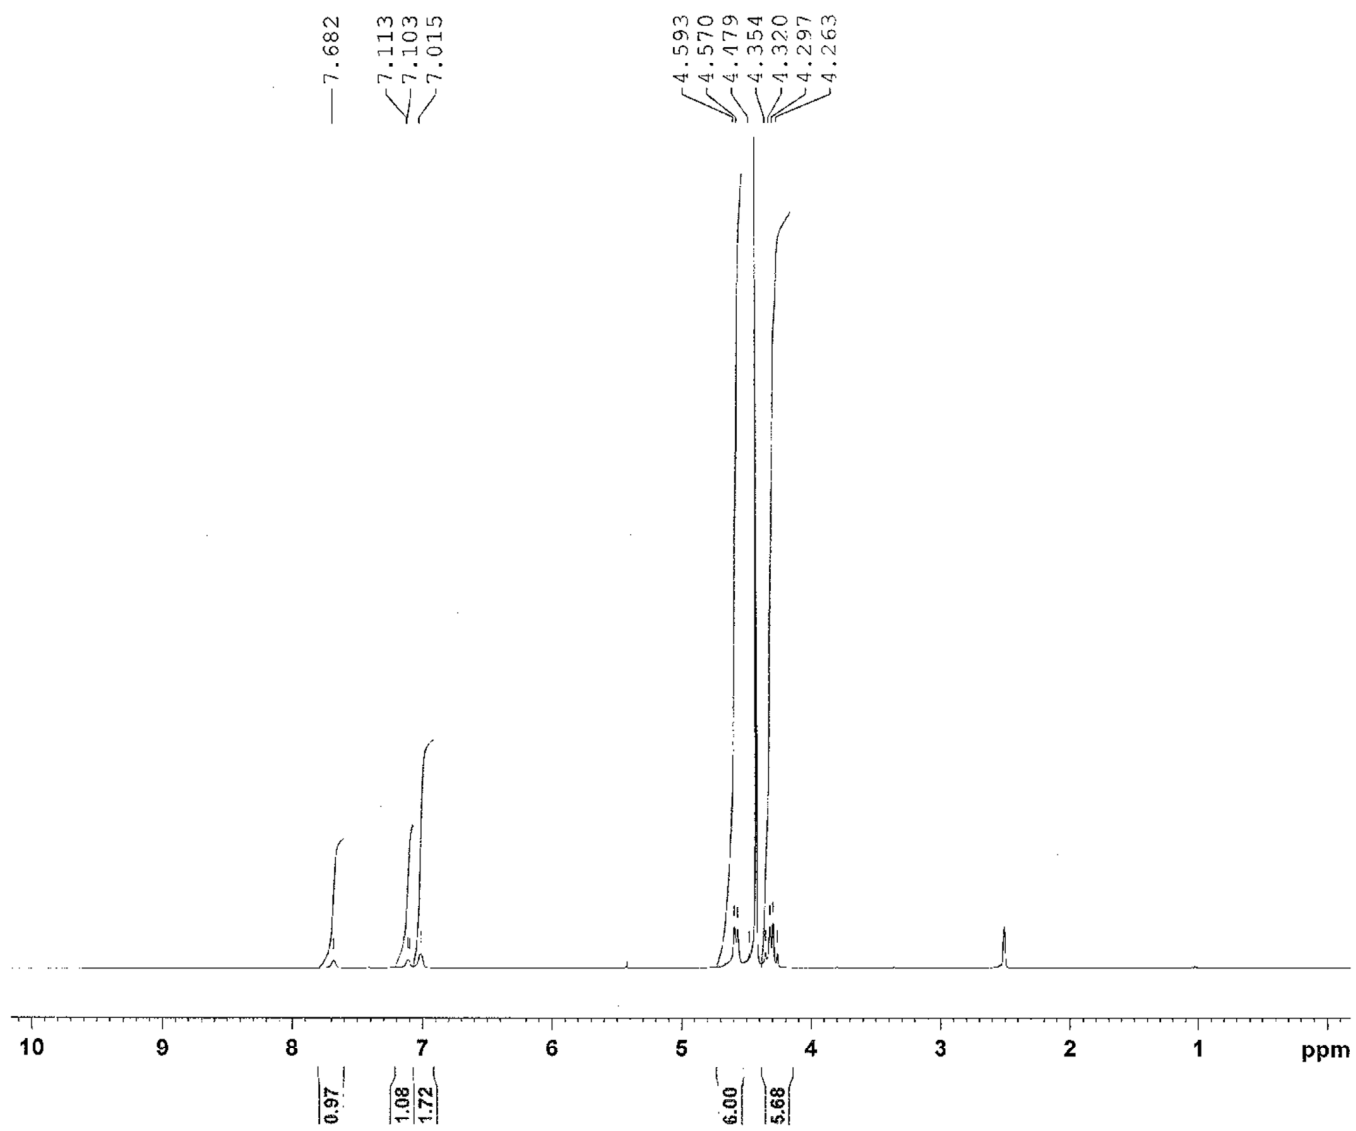

Figure S1.  $^1\text{H}$  NMR spectra for compound 2.

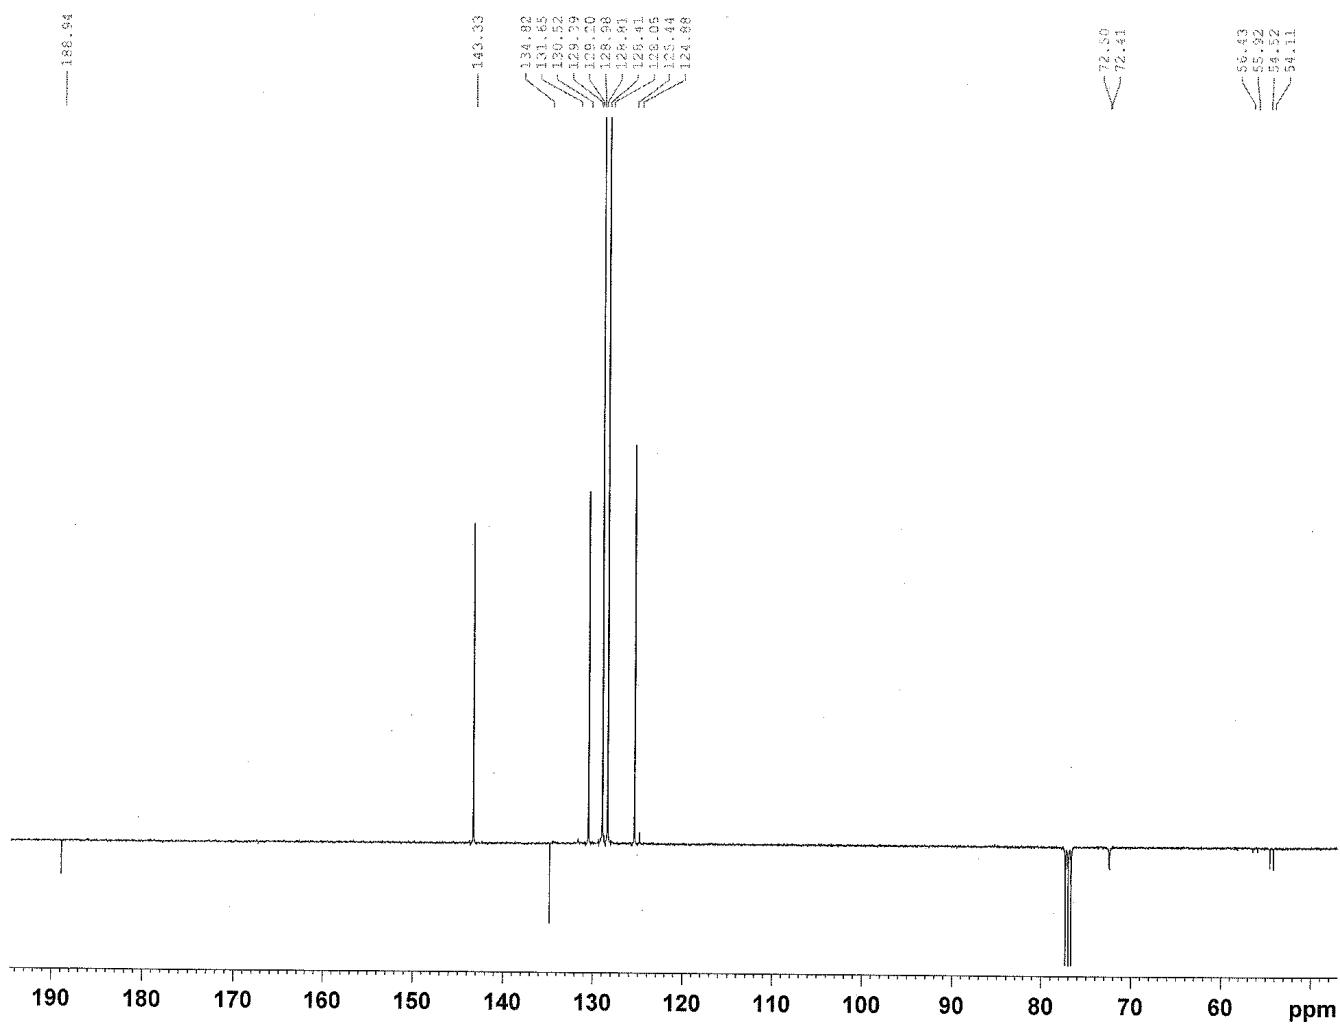

**Figure S2.**  $^{13}\text{C}\{^1\text{H}\}$  NMR spectra for compound 2.

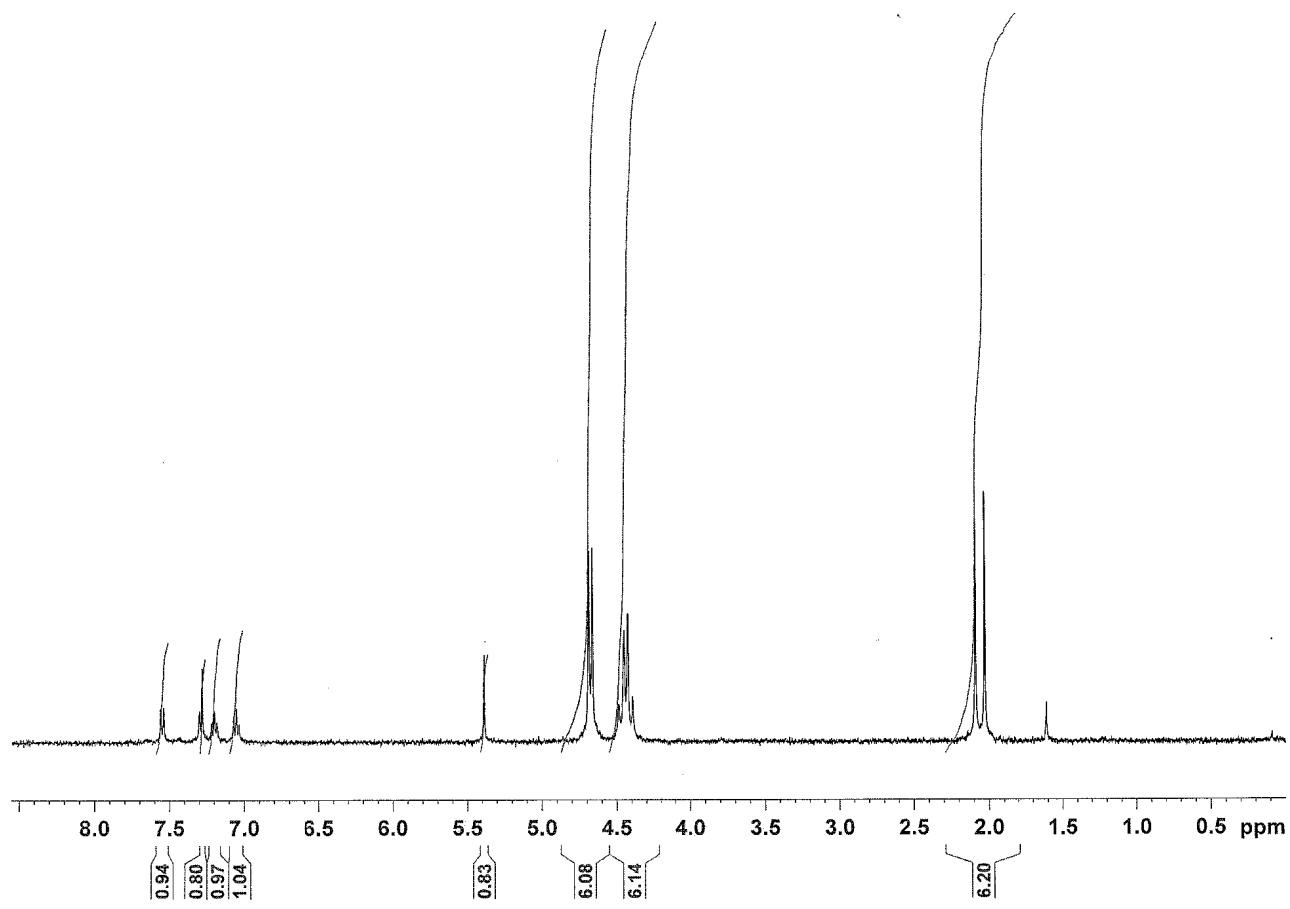

Figure S3. <sup>1</sup>H NMR spectra for compound 3.

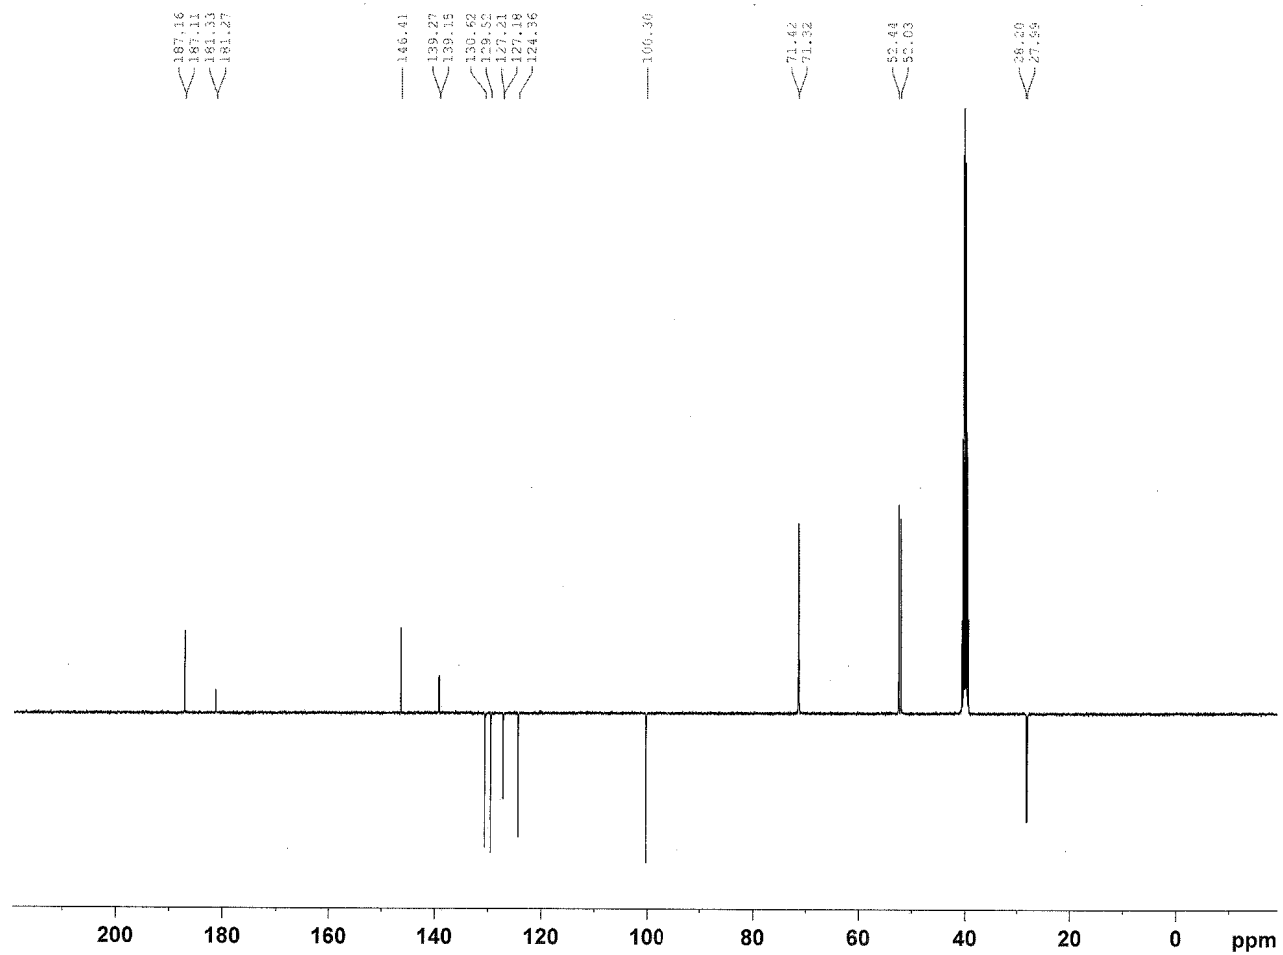

Figure S4.  $^{13}\text{C}\{^1\text{H}\}$  NMR spectra for compound 3.

**2. Stability of ligand 1 and compounds 2-8 in d<sup>6</sup>-DMSO solution and mixtures d<sup>6</sup>-DMSO:D<sub>2</sub>O (50:50) overtime assessed by <sup>31</sup>P{<sup>1</sup>H} NMR spectroscopy.**

**Table S1.** Stability of compounds **2-8** in d<sup>6</sup>-DMSO solution and mixtures d<sup>6</sup>-DMSO:D<sub>2</sub>O (50:50) overtime assessed by <sup>31</sup>P{<sup>1</sup>H} NMR spectroscopy.

|          | d <sup>6</sup> -DMSO |        |        |         |                 |          | d <sup>6</sup> -DMSO/D <sub>2</sub> O |      |        |         |                 |
|----------|----------------------|--------|--------|---------|-----------------|----------|---------------------------------------|------|--------|---------|-----------------|
|          | 1 day                | 4 days | 1 week | 2 weeks | Half life (50%) |          | 1                                     | 4    | 1 week | 2 weeks | Half life (50%) |
| <b>1</b> |                      |        |        |         |                 |          |                                       |      |        |         |                 |
| <b>2</b> | >99%                 | >99%   | >99%   |         | months          | <b>2</b> | 88%                                   | 75%  |        | 50%     | 2 weeks         |
| <b>3</b> | >99%                 |        | >99%   | >99%    | months          | <b>3</b> | >99%                                  | >99% | >99%   |         | months          |
| <b>4</b> |                      |        | >99%   | >99%    | months          | <b>4</b> | >99%                                  |      | >99%   |         | months          |
| <b>5</b> |                      | 43%    | 0%     |         | ~4 days         | <b>5</b> | 83%                                   | 45%  | 0%     |         | ~4 days         |
| <b>6</b> |                      | 94%    |        | 93%     | months          | <b>6</b> | 92%                                   | 86%  |        |         | ~1 month        |
| <b>7</b> | >95%                 | 90%    |        |         | ~1 month        | <b>7</b> | 85%                                   | 65%  | 50%    |         | ~1 week         |
| <b>8</b> | 64%                  | 23%    | 0%     |         | 2 days          | <b>8</b> | 90%                                   | 75%  | 65%    |         | ~2 weeks        |

Half life of ligand **1** (assessed by <sup>31</sup>P{<sup>1</sup>H} NMR spectroscopy) was: months in d<sup>6</sup>-DMSO; 2 weeks in d<sup>6</sup>-DMSO:D<sub>2</sub>O (50:50) and 2 days in D<sub>2</sub>O.

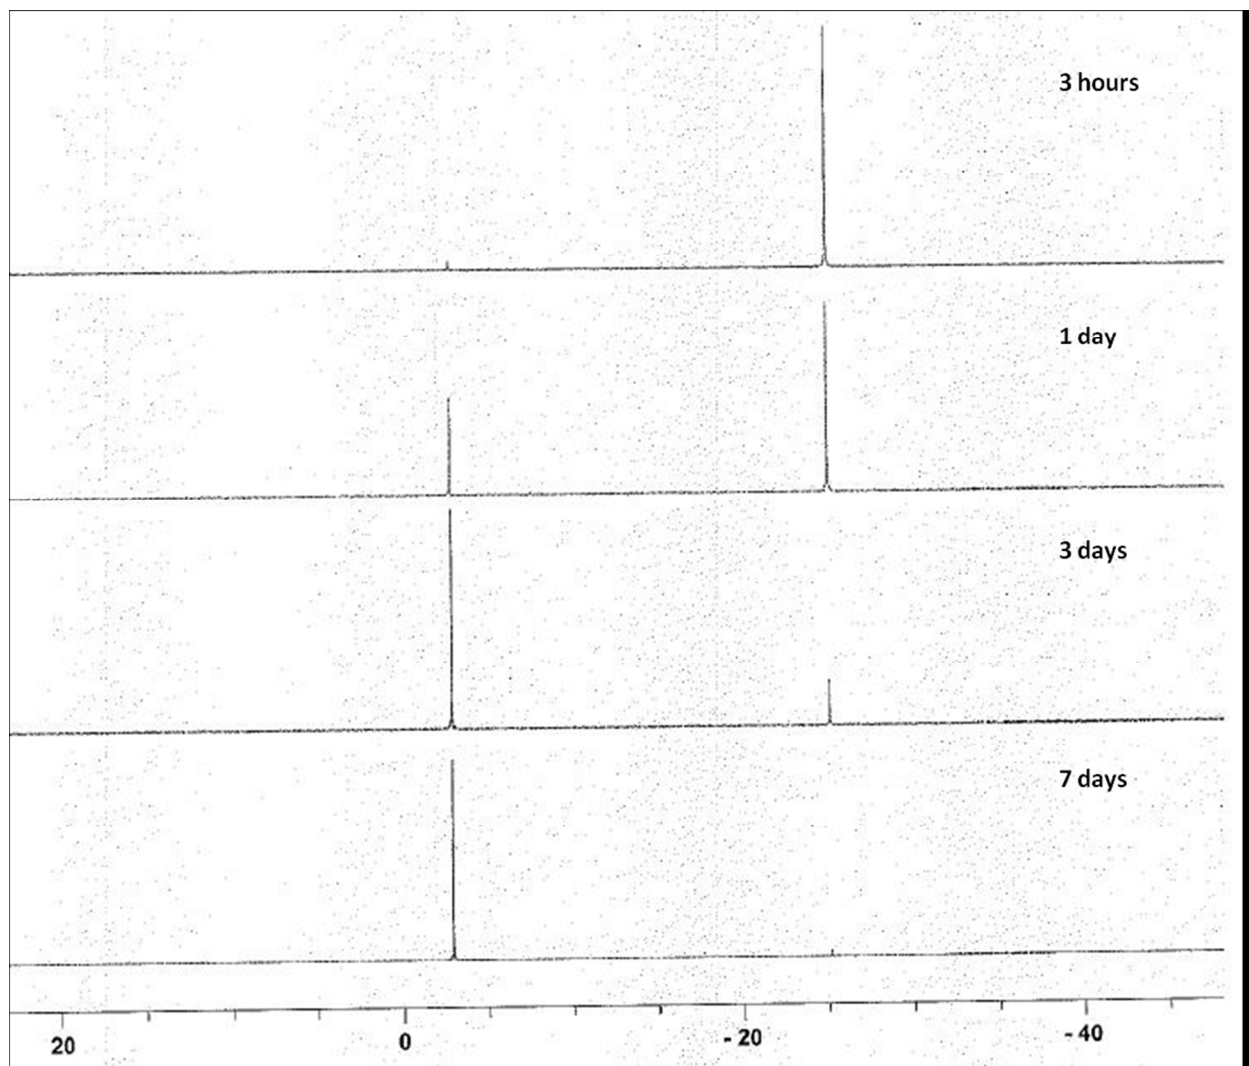

**Figure S5.** Selected  $^{31}\text{P}\{^1\text{H}\}$  NMR spectra showing the decomposition of ligand **1** in  $\text{D}_2\text{O}$  ( $\delta$ -25.1 (s)) overtime. The peak at -3.4 ppm corresponds to TPA=O in  $\text{D}_2\text{O}$ .

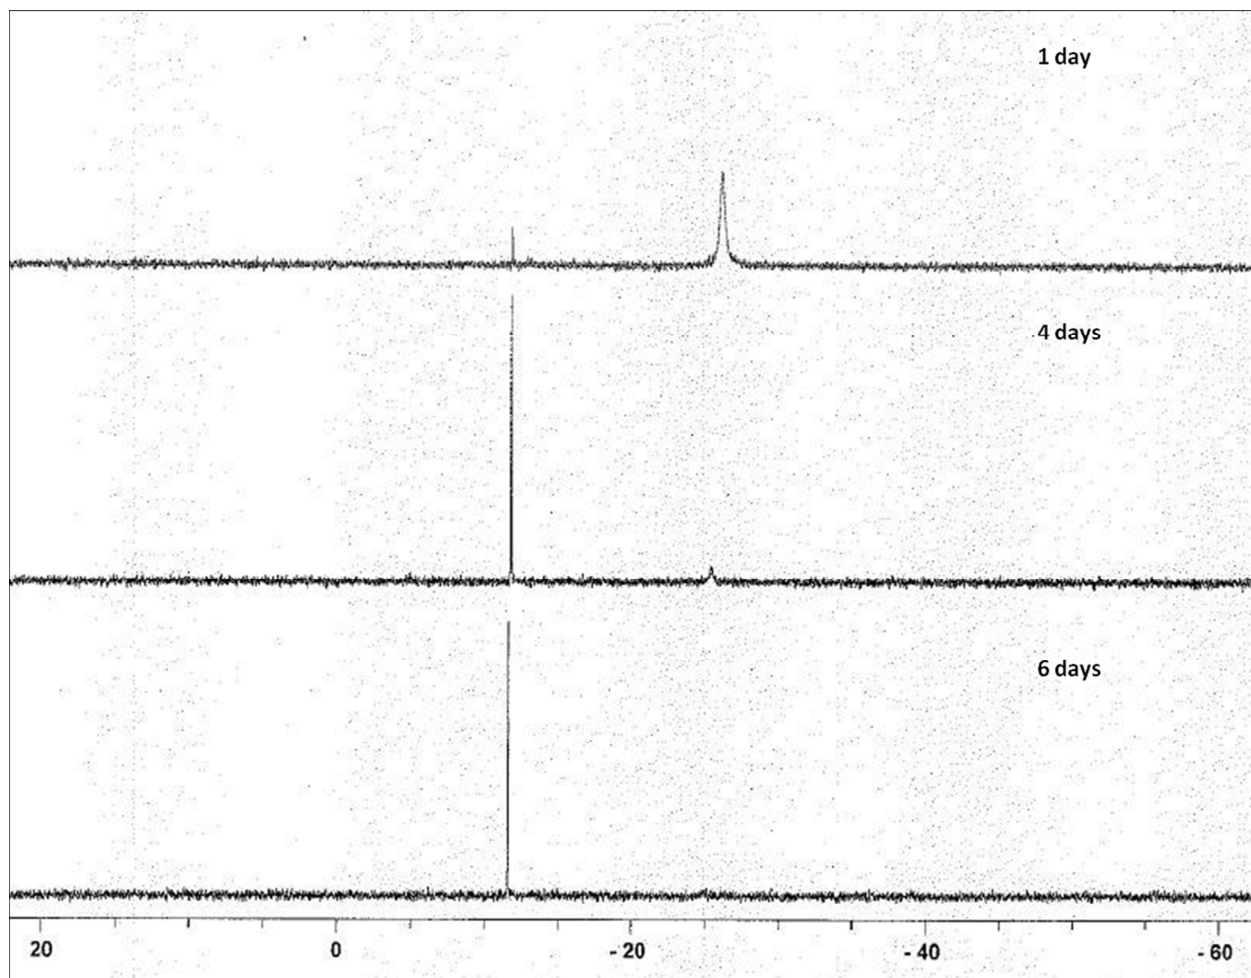

**Figure S6.** Selected  $^{31}\text{P}\{^1\text{H}\}$  NMR spectra showing the decomposition of compound **5** in  $d^6$ -DMSO: $\text{D}_2\text{O}$  (50:50) ( $\delta$  -27.0 (s)) overtime. The peak at -12.0 ppm corresponds to TPA=O in  $d^6$ -DMSO: $\text{D}_2\text{O}$  (50:50).



### 3. Crystal data and structure refinement for complex 3.

**Table S2.** Crystal data and structure refinement for complex 3.

|                                          |                                                                   |
|------------------------------------------|-------------------------------------------------------------------|
| formula                                  | C <sub>18</sub> H <sub>24</sub> N <sub>4</sub> O <sub>3</sub> PPd |
| Fw                                       | 481.78                                                            |
| T [K]                                    | 293(2) K                                                          |
| $\lambda$ (MoK $\alpha$ )[Å]             | 0.71073                                                           |
| crystal system                           | monoclinic,                                                       |
| Space group                              | P2(1)/c                                                           |
| $a$ [Å]                                  | 9.5820(19)                                                        |
| $b$ [Å]                                  | 20.496(4)                                                         |
| $c$ [Å]                                  | 10.647(2)                                                         |
| $\alpha$ [°]                             | 90 deg                                                            |
| $\beta$ [°]                              | 106.92(3)                                                         |
| $\chi$ [°]                               | 90 deg.                                                           |
| $V$ [Å] <sup>3</sup>                     | 2000.5(7)                                                         |
| $Z$                                      | 4                                                                 |
| $D_{\text{calcd}}$ (g cm <sup>-3</sup> ) | 1.600                                                             |
| $\mu$ (mm <sup>-1</sup> )                | 1.033                                                             |
| $R(F_o)^a$                               | 0.0376 [for 3411 data with $F_o^2 > 2\sigma(F_o^2)$ ]             |
| $R_w(F_o^2)^b$                           | 0.0968                                                            |

---

$$^a R(F_o) (= R1) = \Sigma ||F_o| - |F_c|| / \Sigma |F_o|. \quad ^b R_w(F_o^2) (= wR2) = \{ \Sigma [ w(F_o^2 - F_c^2)^2 ] / \Sigma [ w(F_o^2)^2 ] \}^{1/2}$$
